# Supplementary material for: Analysis of the Roles of the ISLR2 Gene in Regulating the Toxicity of Zearalenone Exposure in Porcine Intestinal Epithelial Cells
Source: MDPI journal article supplement (doi:10.3390/toxins14090639), 2022-09-16
Supplement: s1 [file s1]

Article

# Analysis of the Roles of the *ISLR2* Gene in Regulating the Toxicity of Zearalenone Exposure in Porcine Intestinal Epithelial Cells

Zhenbin Bi, Xuezhu Gu, Yeyi Xiao, Yajing Zhou, Wenbin Bao, Shenglong Wu and Haifei Wang

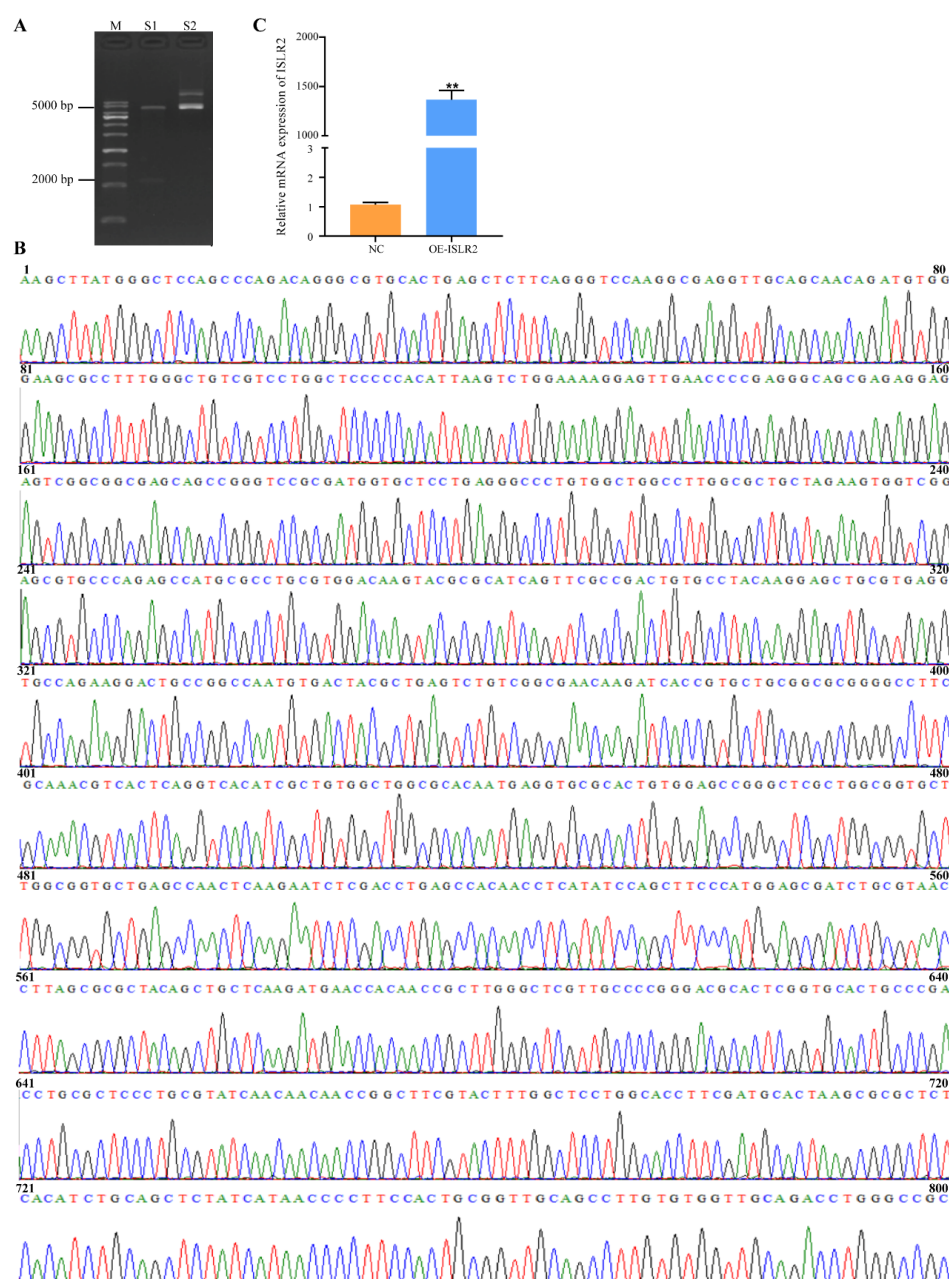

**Figure S1. Construction of *ISLR2* overexpression cells.** (A) Enzyme digested products of the plasmids overexpressing *ISLR2* by agarose gel. M: 1 kb ladder; S1: enzyme digested products of the plasmids with *Xho*I; S2: products of undigested sample; (B) PCR sequencing of the plasmids overexpressing *ISLR2*. (C) Efficiency of *ISLR2* overexpression by qRT-PCR. NC, cells transfected with an empty vector; OE-*ISLR2*, cells transfected with an *ISLR2* overexpression vector. Data were presented as mean  $\pm$  SD. Significance compared with control, \*\* $P < 0.01$ .
